# Supplementary material
Source: publisher site journal article supplement (https://www.dovepress.com/article/555953)
Supplement: Supplementary file 1 [file 555953%20Supplementary%20Table%20S1.docx]

**Supplementary Table S1.** ICD-codes of autoimmune diseases and the number of each autoimmune disease patient

| Autoimmune disease | ICD-9 code | ICD-10 code | Number of patients |
| --- | --- | --- | --- |
| Systemic lupus erythematosus | 7100 | M32, M321, M3210, M3211, M3212, M3213, M3214, M3215, M3219, M328, M329 | 198 |
| Rheumatoid arthritis | 7140, 7142, 71481 | M05, M051, M0510, M0511, M05111, M05112, M05119, M0512, M05121, M05122, M05129, M0513, M05131, M05132, M05139, M0514, M05141, M05142, M05149, M0515, M05151, M05152, M05159, M0516, M05161, M05162, M05169, M0517, M05171, M05172, M05179, M0519, M052, M0520, M0521, M05211, M05212, M05219, M0522, M05221, M05222, M05229, M0523, M05231, M05232, M05239, M0524, M05241, M05242, M05249, M0525, M05251, M05252, M05259, M0526, M05261, M05262, M05269, M0527, M05271, M05272, M05279, M0529, M053, M0530, M0531, M05311, M05312, M05319, M0532, M05321, M05322, M05329, M0533, M05331, M05332, M05339, M0534, M05341, M05342, M05349, M0535, M05351, M05352, M05359, M0536, M05361, M05362, M05369, M0537, M05371, M05372, M05379, M0539, M054, M0540, M0541, M05411, M05412, M05419, M0542, M05421, M05422, M05429, M0543, M05431, M05432, M05439, M0544, M05441, M05442, M05449, M0545, M05451, M05452, M05459, M0546, M05461, M05462, M05469, M0547, M05471, M05472, M05479, M0549, M055, M0550, M0551, M05511, M05512, M05519, M0552, M05521, M05522, M05529, M0553, M05531, M05532, M05539, M0554, M05541, M05542, M05549, M0555, M05551, M05552, M05559, M0556, M05561, M05562, M05569, M0557, M05571, M05572, M05579, M0559, M056, M0560, M0561, M05611, M05612, M05619, M0562, M05621, M05622, M05629, M0563, M05631, M05632, M05639, M0564, M05641, M05642, M05649, M0565, M05651, M05652, M05659, M0566, M05661, M05662, M05669, M0567, M05671, M05672, M05679, M0569, M057, M0570, M0571, M05711, M05712, M05719, M0572, M05721, M05722, M05729, M0573, M05731, M05732, M05739, M0574, M05741, M05742, M05749, M0575, M05751, M05752, M05759, M0576, M05761, M05762, M05769, M0577, M05771, M05772, M05779, M0579, M058, M0580, M0581, M05811, M05812, M05819, M0582, M05821, M05822, M05829, M0583, M05831, M05832, M05839, M0584, M05841, M05842, M05849, M0585, M05851, M05852, M05859, M0586, M05861, M05862, M05869, M0587, M05871, M05872, M05879, M0589, M059, M06, M060, M0600, M0601, M06011, M06012, M06019, M0602, M06021, M06022, M06029, M0603, M06031, M06032, M06039, M0604, M06041, M06042, M06049, M0605, M06051, M06052, M06059, M0606, M06061, M06062, M06069, M0607, M06071, M06072, M06079, M0608, M0609, M068, M0680, M0681, M06811, M06812, M06819, M0682, M06821, M06822, M06829, M0683, M06831, M06832, M06839, M0684, M06841, M06842, M06849, M0685, M06851, M06852, M06859, M0686, M06861, M06862, M06869, M0687, M06871, M06872, M06879, M0688, M0689, M069 | 575 |
| Systemic sclerosis | 5172, 7101 | M34, M340, M341, M348, M3481, M3482, M3483, M3489, M349 | 64 |
| Psoriasis | 6960, 6961, 6968 | L40, L400, L401, L404, L405, L4050, L4051, L4052, L4053, L4059, L408, L409 | 371 |
| Ankylosing spondylitis | 7200 | M45, M450, M451, M452, M453, M454, M455, M456, M457, M458, M459, M46 | 47 |
| Vasculitis a | 1361, 4430, 4460, 4464, 4465, 4467, 71120, 71121, 71122, 71123, 71124, 71125, 71126, 71127, 71128, 71129 | M30, M300, M301, M303, M308, M313, M3130, M3131, M314, M315, M316, M317, M352 | 165 |
| Idiopathic inflammatory myopathies b | 7103, 7104, 35971, 35979 | G7241, M33, M331, M3310, M3311, M3312, M3313, M3319, M332, M3320, M3321, M3322, M3329, M339, M3390, M3391, M3392, M3393, M3399 | 35 |
| Crohn's disease | -- | K50, K500, K5000, K5001, K50011, K50012, K50013, K50014, K50018, K50019, K501, K5010, K5011, K50111, K50112, K50113, K50114, K50118, K50119, K508, K5080, K5081, K50811, K50812, K50813, K50814, K50818, K50819, K509, K5090, K5091, K50911, K50912, K50913, K50914, K50918, K50919 | 105 |
| Ulcerative colitis | 5560, 5561, 5562, 5563, 5565, 5566, 5568, 5569 | K51, K510, K5100, K5101, K51011, K51012, K51013, K51014, K51018, K51019, K512, K5120, K5121, K51211, K51212, K51213, K51214, K51218, K51219, K513, K5130, K5131, K51311, K51312, K51313, K51314, K51318, K51319, K518, K5180, K5181, K51811, K51812, K51813, K51814, K51818, K51819, K519, K5190, K5191, K51911, K51912, K51913, K51914, K51918, K51919 | 216 |
| Autoimmune hepatic diseases c | 57142 | K743, K754, K8301 | 137 |

a Vasculitis included Behcet's syndrome, Raynaud's syndrome, polyarteritis nodosa, Wegener's granulomatosis, giant cell arteritis, Takayasu's disease, Churg-Strauss syndrome, Kawasaki's Disease and microscopic polyangiitis.

b Idiopathic inflammatory myopathies included dermatomyositis, polymyositis and inclusion body myositis.

c Autoimmune hepatic diseases included primary biliary cirrhosis, autoimmune hepatitis and primary sclerosing cholangitis.
